# Supplementary material for: Novel naphtho[1,2-b:5,6-b′]dithiophene core linear donor–π–acceptor conjugated small molecules with thiophene-bridged bithiazole acceptor: design, synthesis, and their application in bulk heterojunction organic solar cells
Source: Royal Society of Chemistry journal article supplement (doi:10.1039/c2jm30934c), 2012-01-01
Supplement: c2jm30934c.pdf [file c2jm30934c.pdf]

## Electronic Supplementary Information (ESI)

# **Novel naphtho[1,2-*b*:5,6-*b'*]dithiophene core inear donor- $\pi$ -acceptor conjugated small molecules with thiophene-bridged bithiazole acceptor: Design, synthesis, and their application in bulk heterojunction organic solar cells**

Pranabesh Dutta<sup>a</sup>, Wooseung yang<sup>a</sup>, Woo –Hyung Lee<sup>b</sup>, In Nam Kang<sup>b</sup>, Soo-Hyoung Lee <sup>\*a</sup>

<sup>a</sup>School of Semiconductor and Chemical Engineering, Chonbuk National University, Duckjin-dong 664-14, Jeonju 561- 756, Republic of Korea.

<sup>b</sup>Department of Chemistry, The Catholic University, 43-1, Yeokaok2-dong, Wonmi-gu, Buchensi, Gyeonggi-do 420-743, Republic of Korea.

\*Corresponding author; Telephone: +063-270-2435, Fax: +063-270-2306,

E-mail: \*shlee66@jbnu.ac.kr;

S2

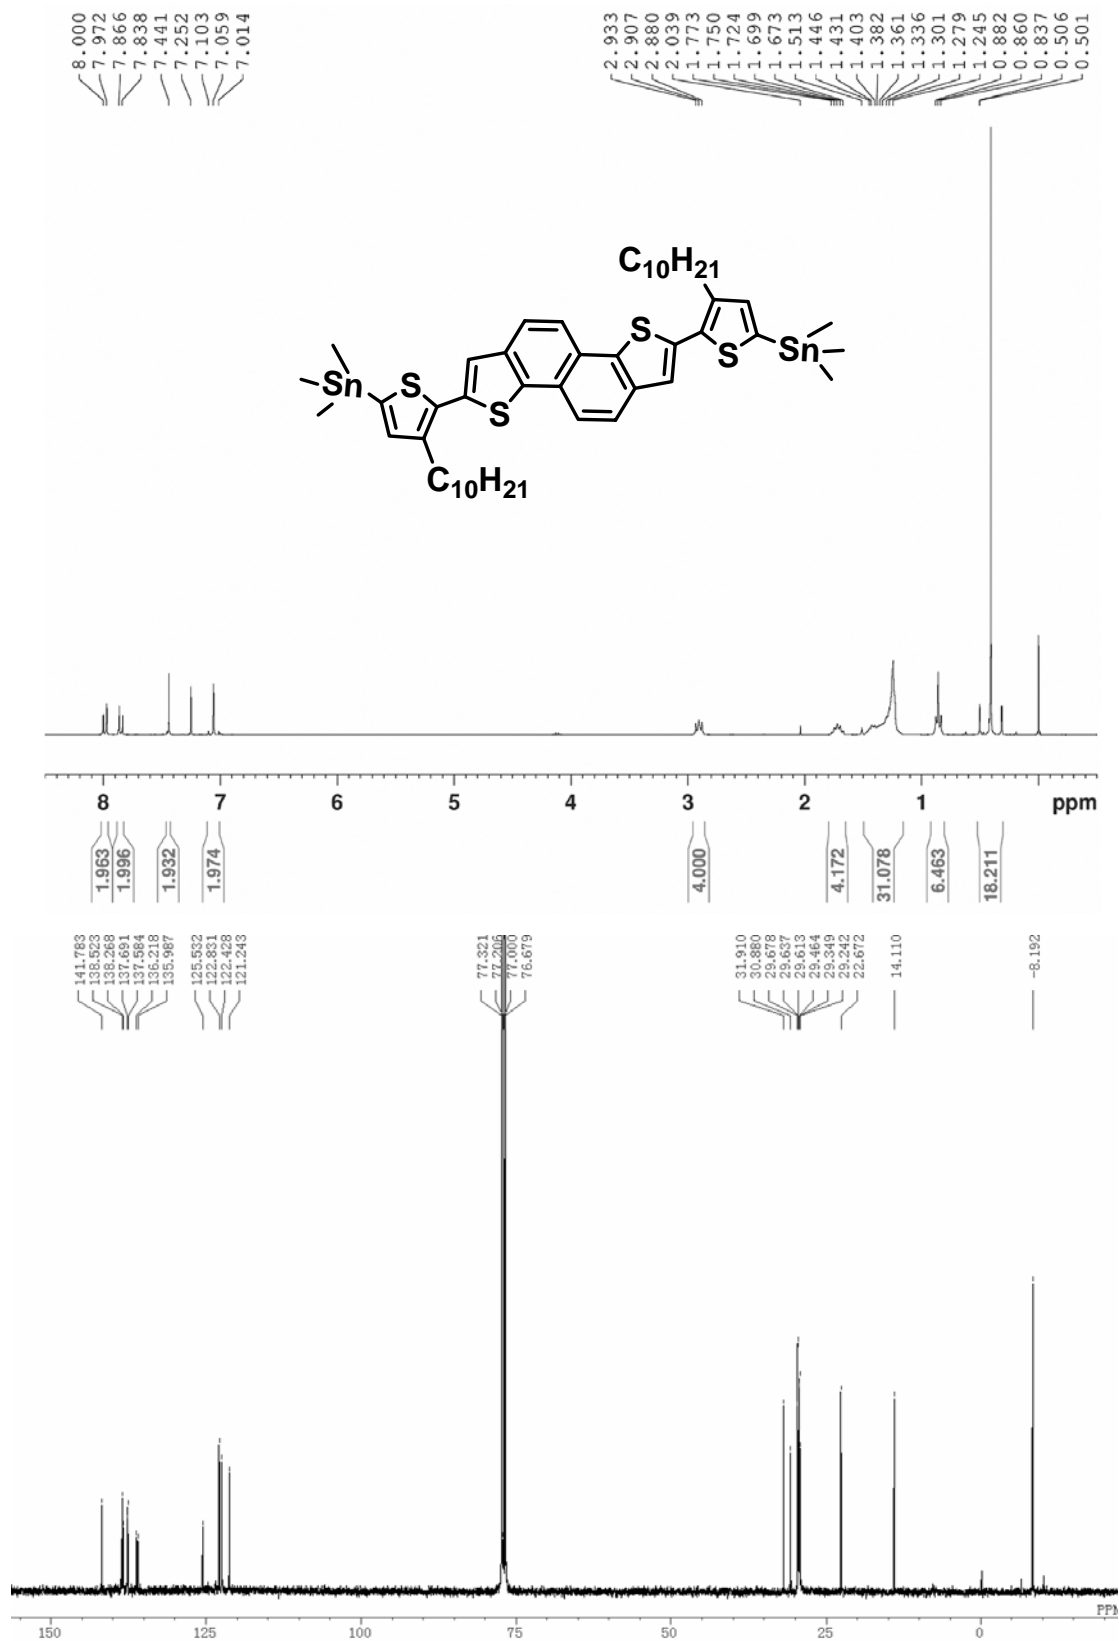

Fig. S1  $^1\text{H-NMR}$  and  $^{13}\text{C-NMR}$  spectra of compound **10** in  $\text{CDCl}_3$

S3

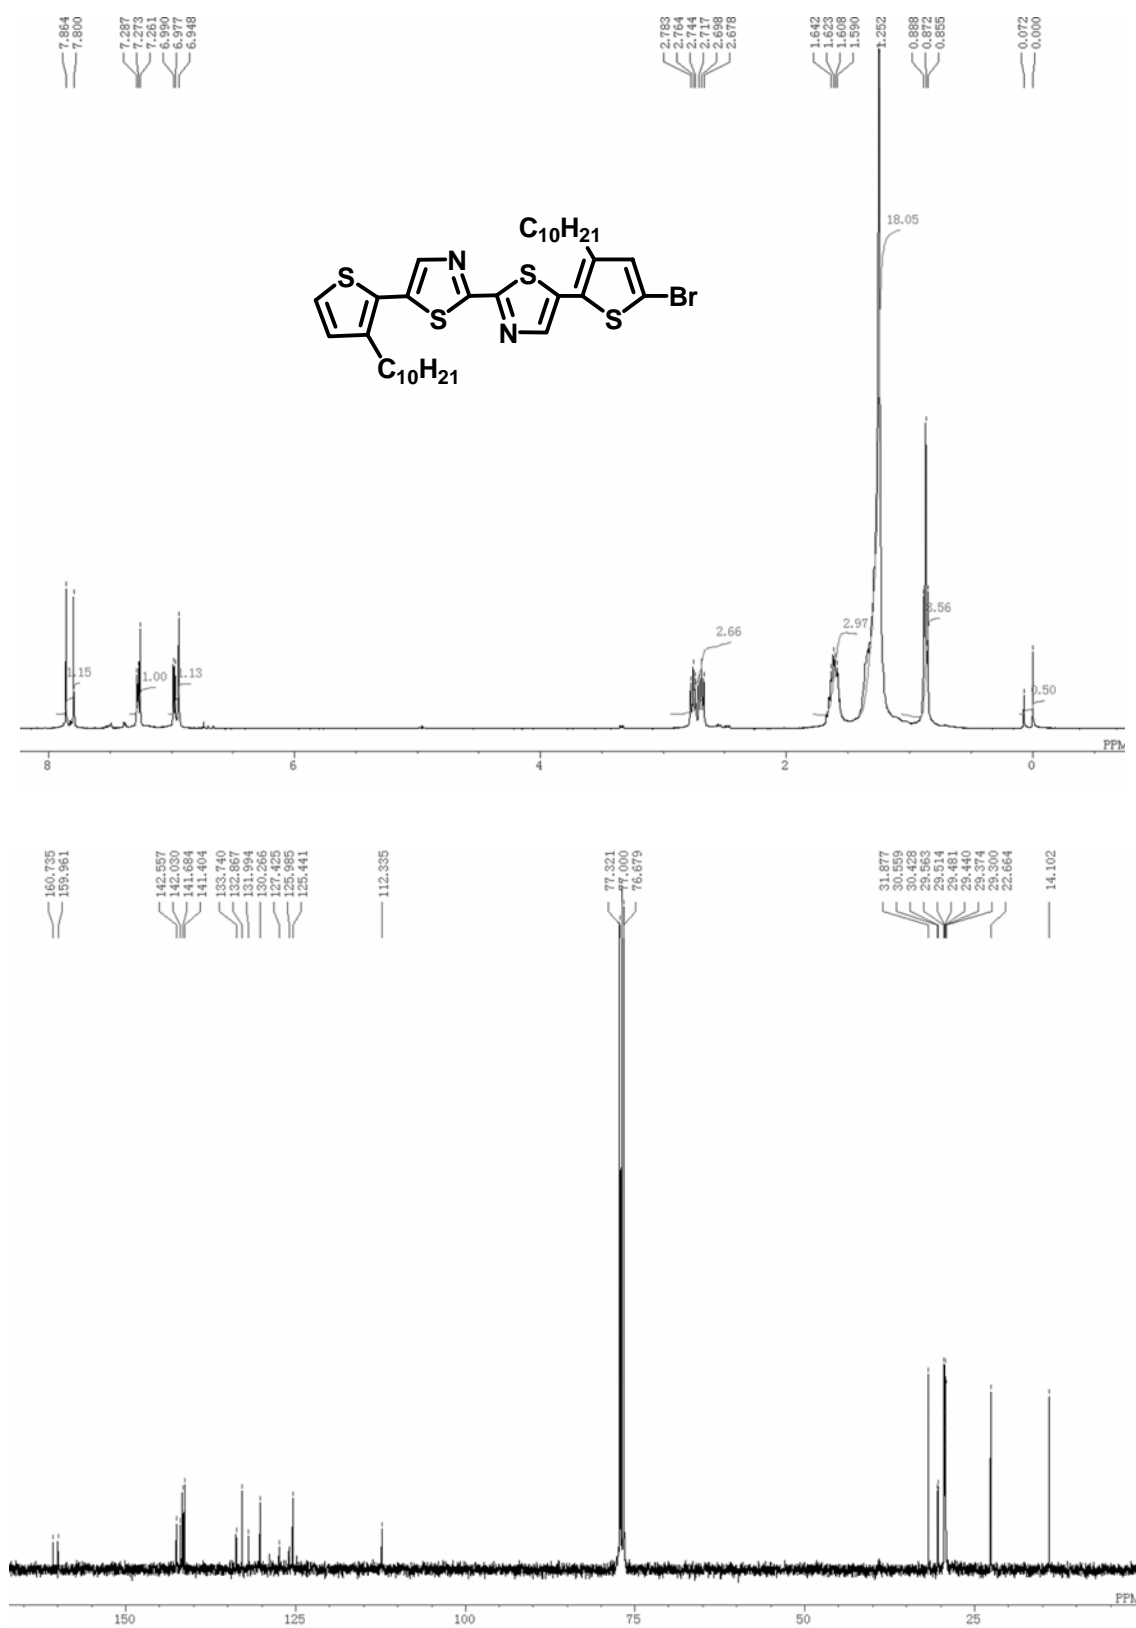

Fig. S2. <sup>1</sup>H-NMR and <sup>13</sup>C NMR spectra of compound **15** in CDCl<sub>3</sub>

S4

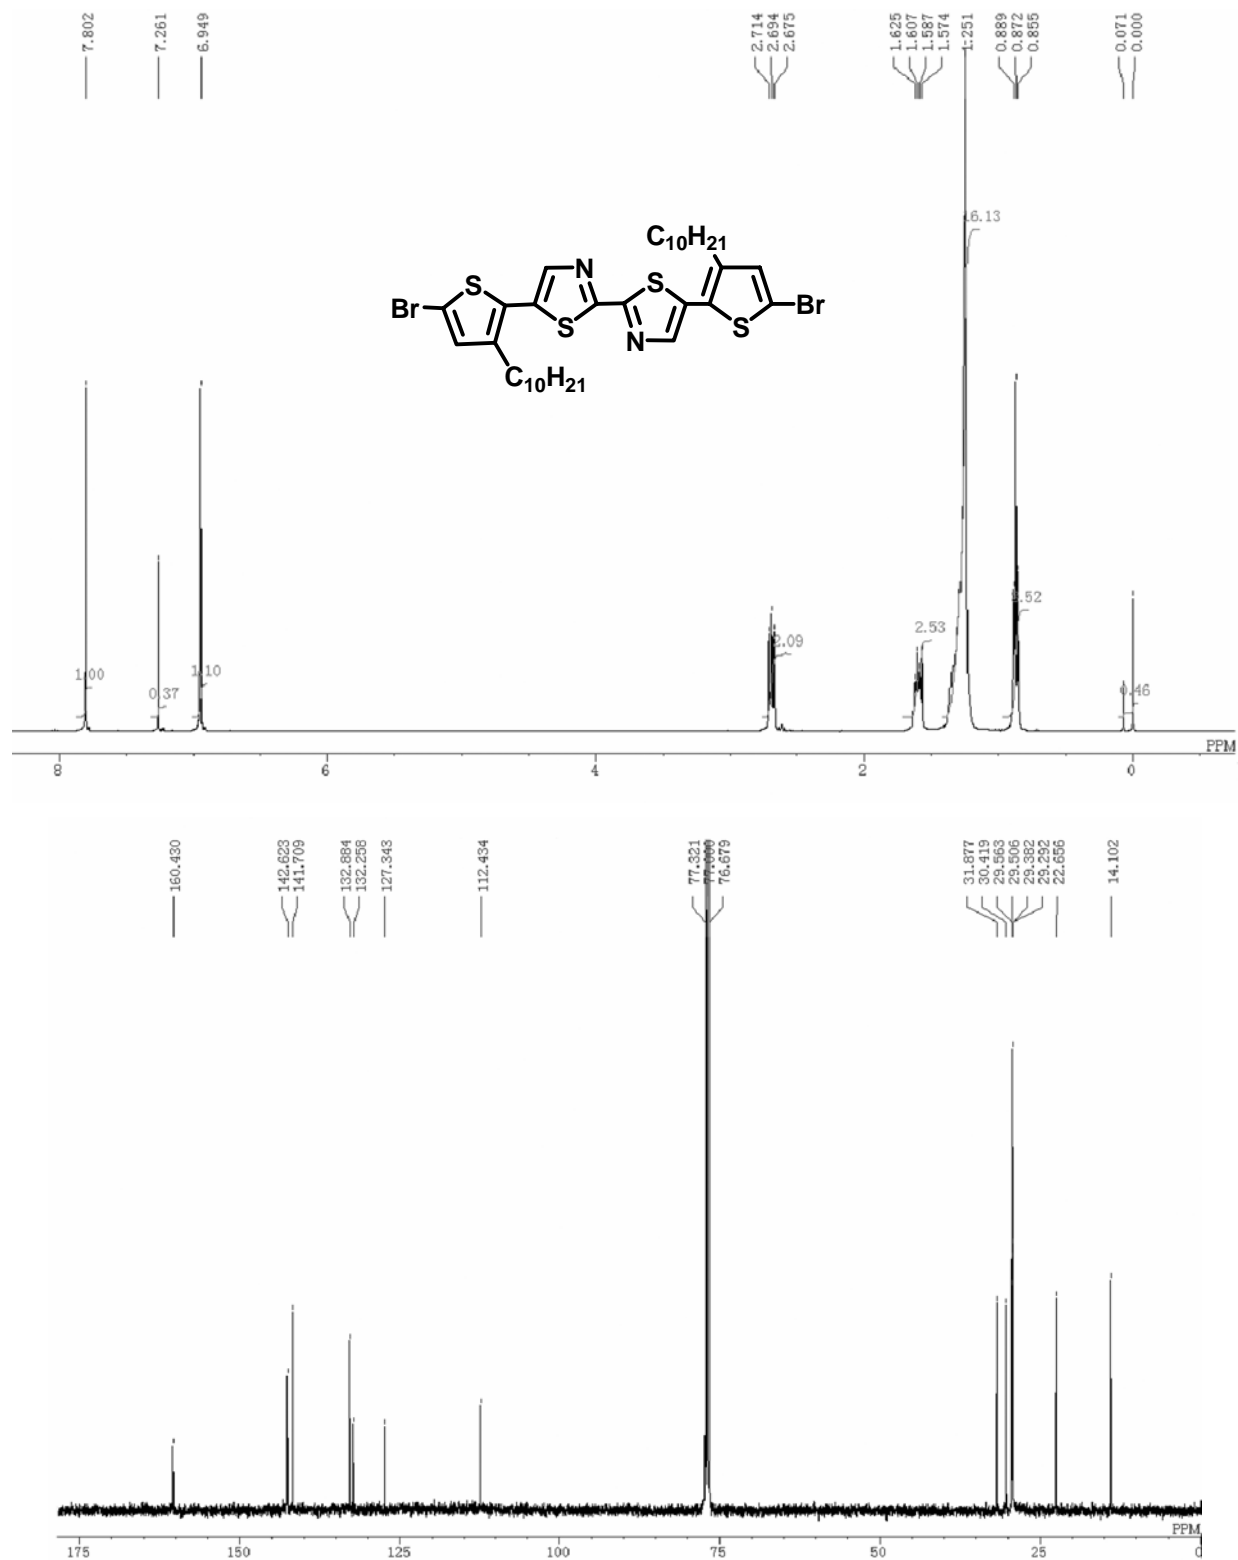

Fig. S3. <sup>1</sup>H-NMR and <sup>13</sup>C NMR spectra of compound 16 in CDCl<sub>3</sub>

S5

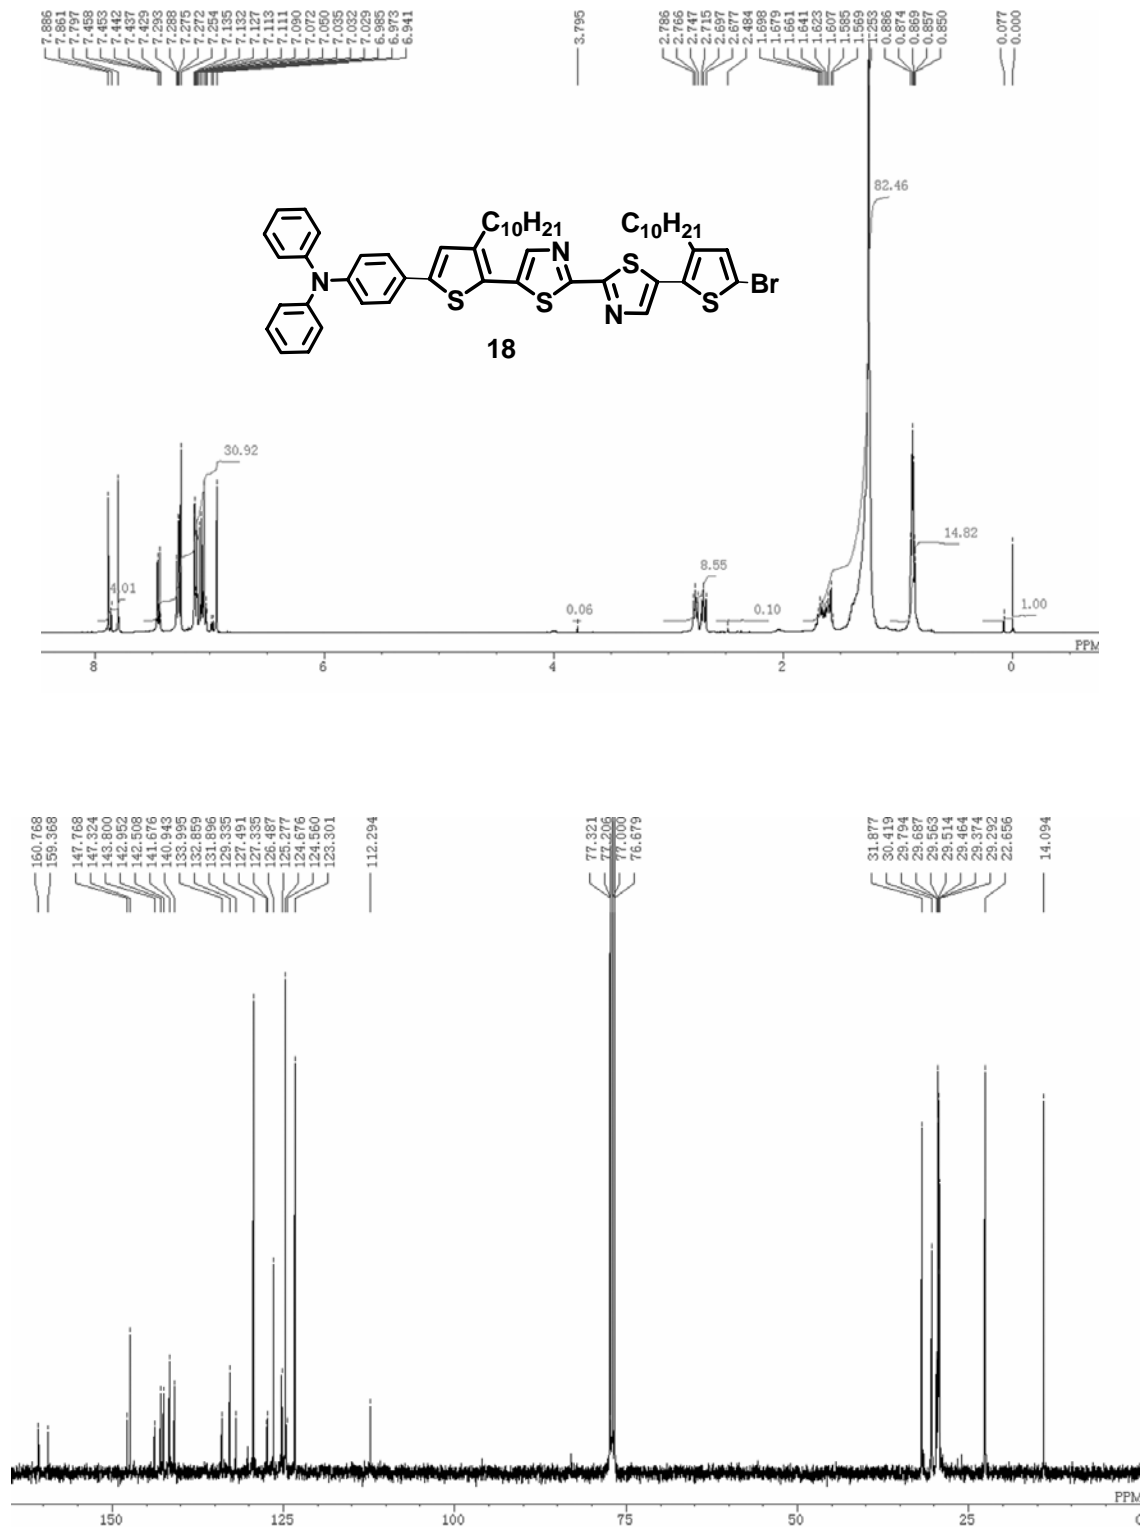

Fig. S4. <sup>1</sup>H-NMR and <sup>13</sup>C NMR spectra of compound **18** in CDCl<sub>3</sub>

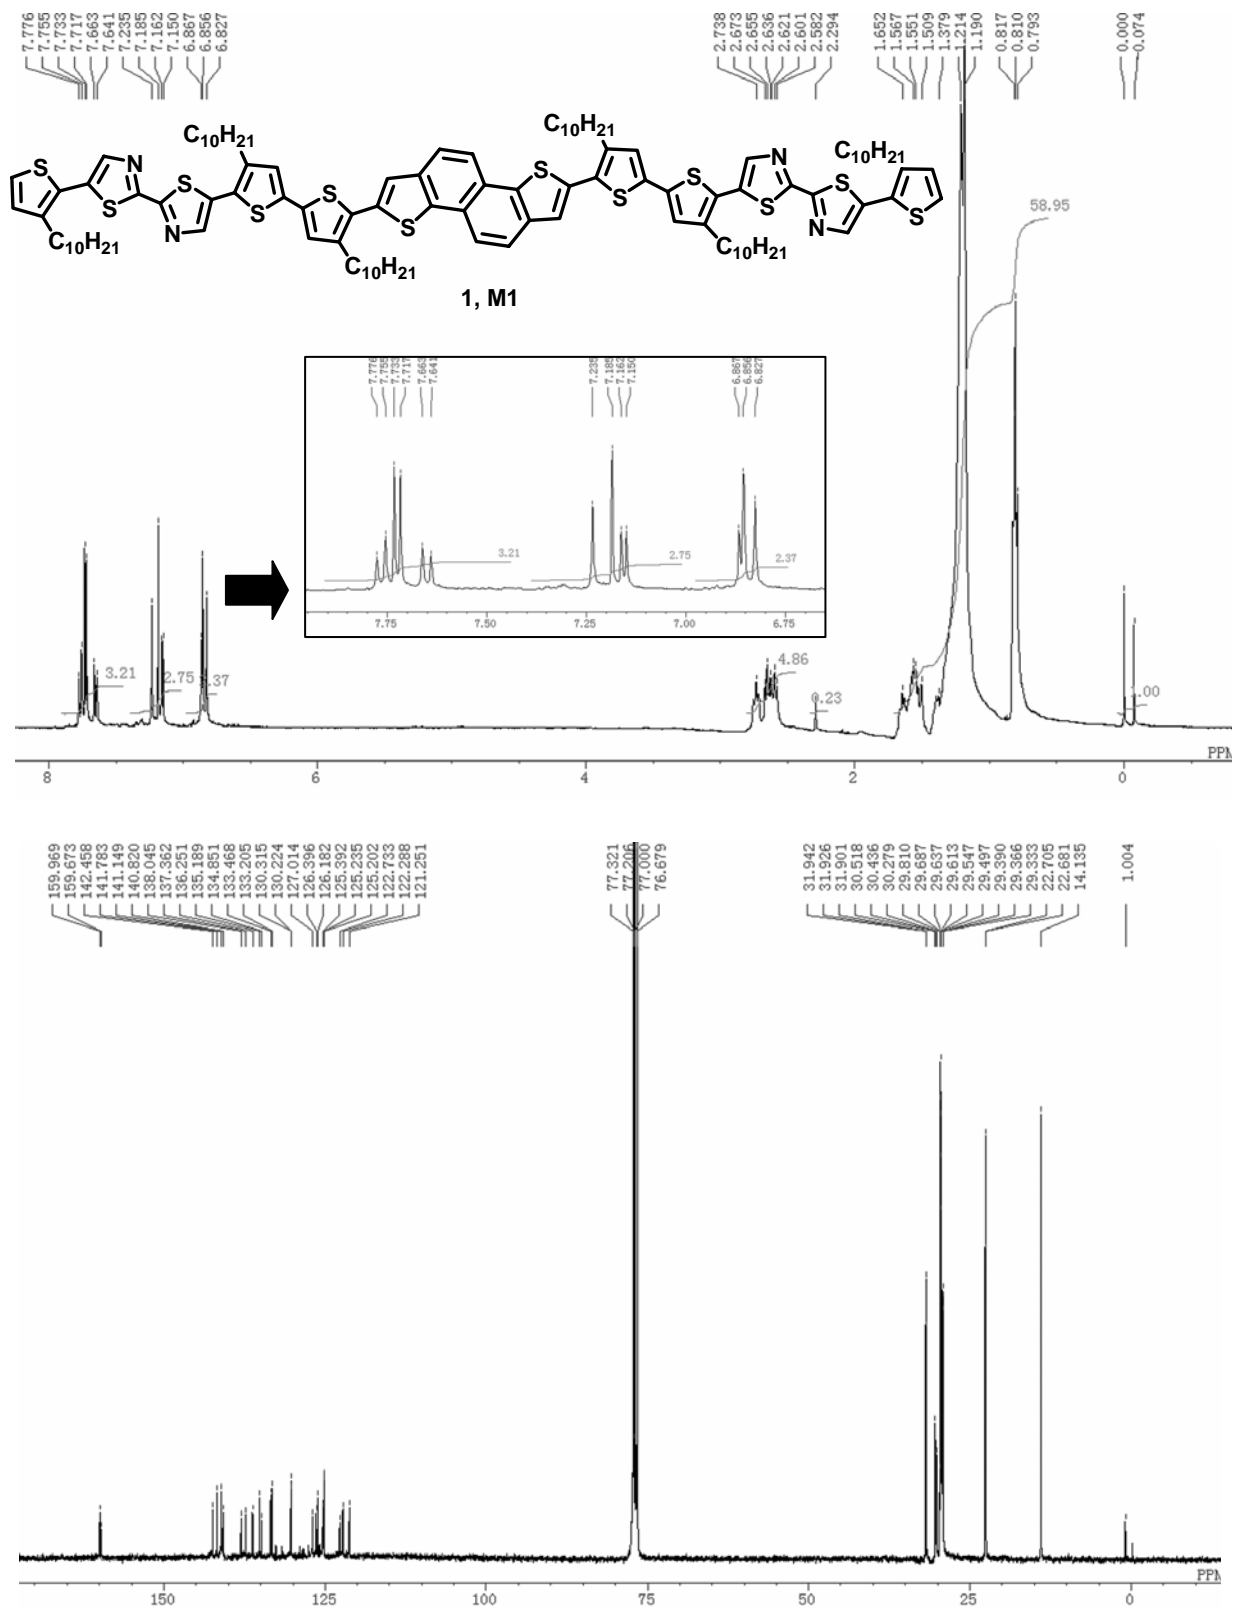

**Fig. S5.** <sup>1</sup>H-NMR and <sup>13</sup>C NMR spectra of compound M3 (1) in CDCl<sub>3</sub>

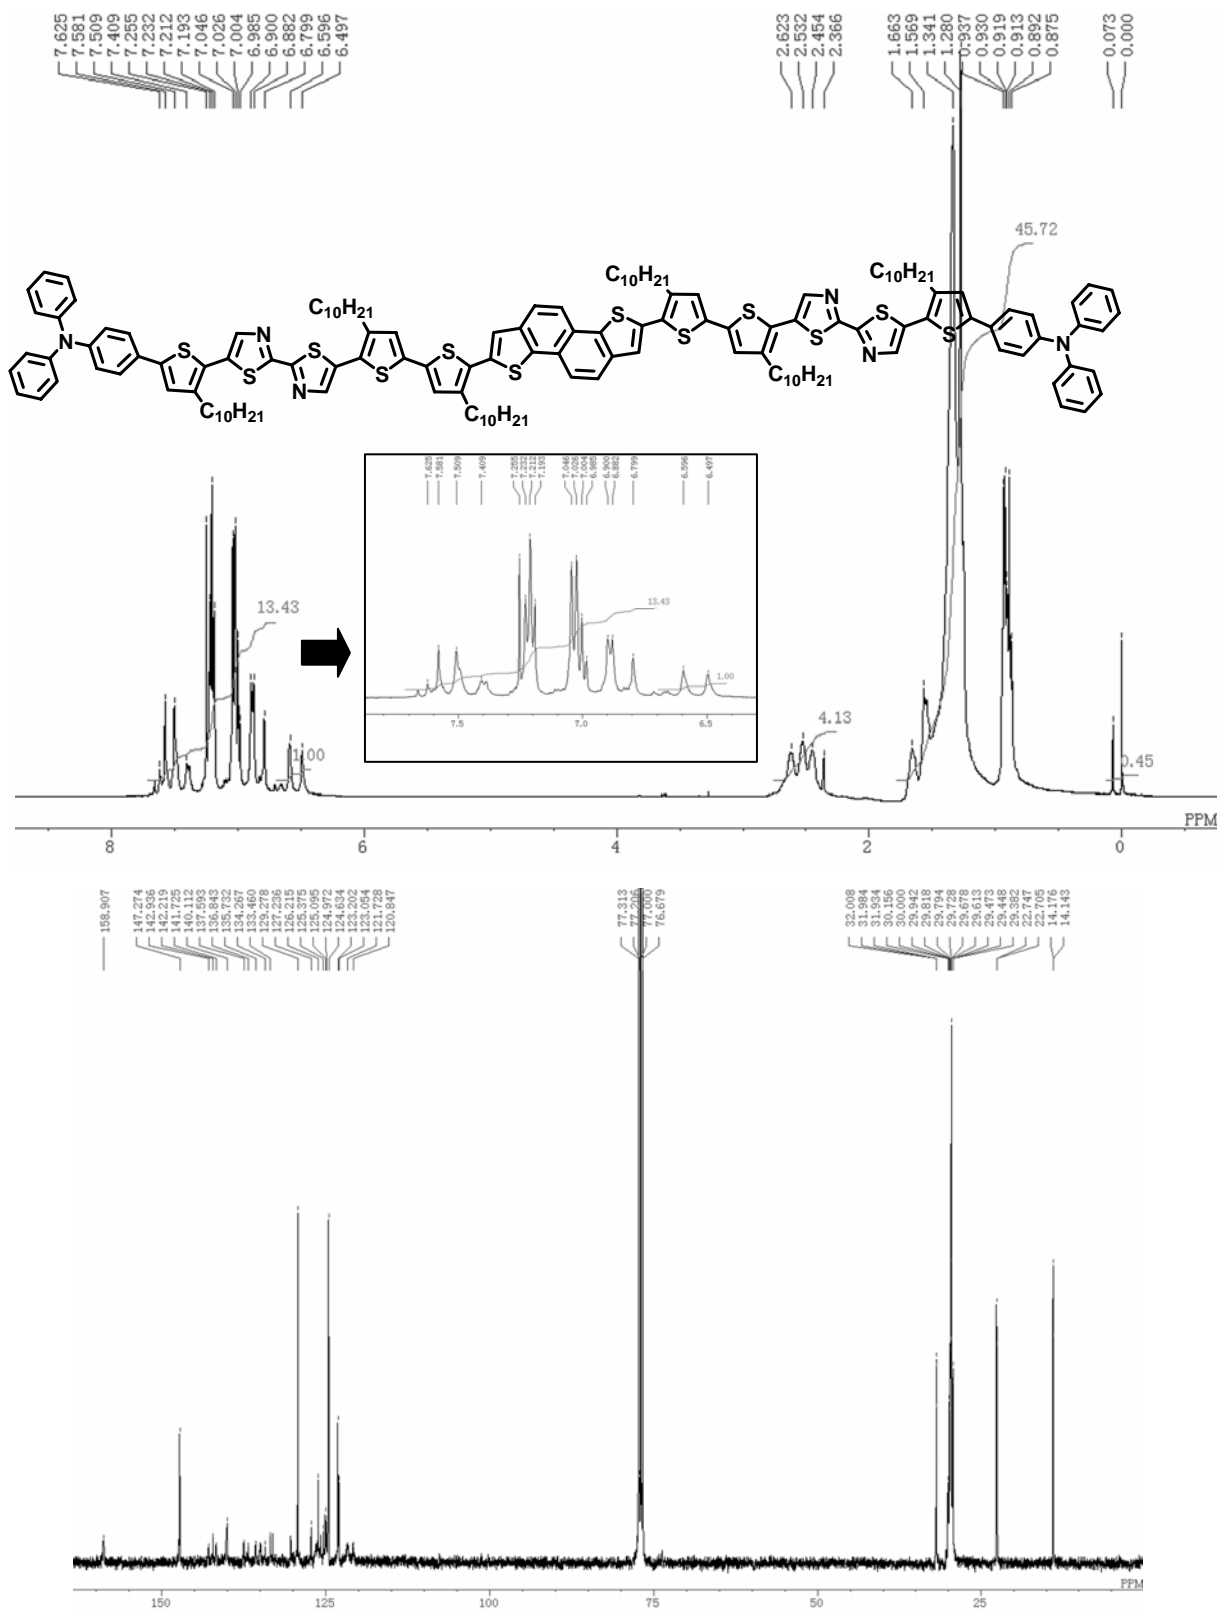

Fig. S6. <sup>1</sup>H-NMR and <sup>13</sup>C NMR spectra of compound M4 (2) in CDCl<sub>3</sub>

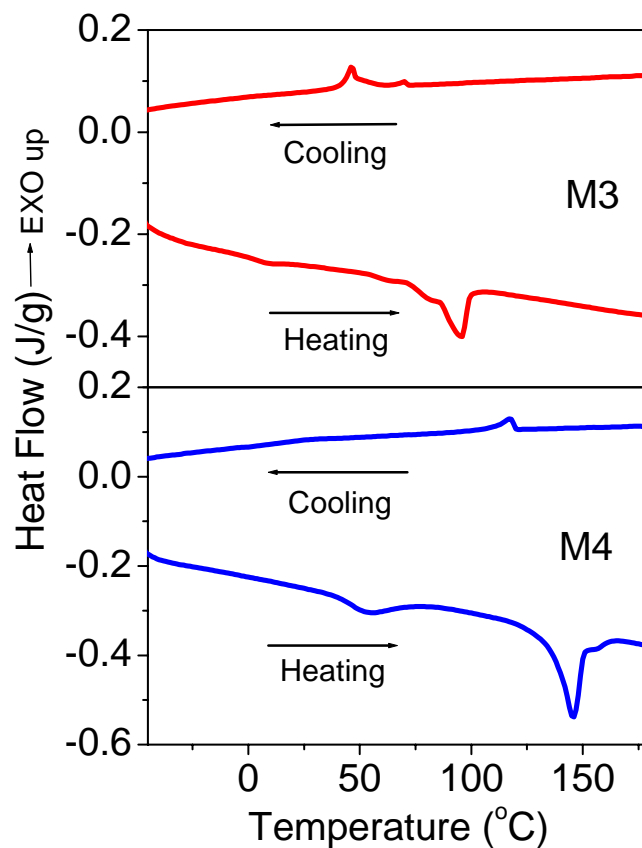

**Fig. S7.** DSC traces of the small molecules at a scanning rate of 10°C/min in the second heating and cooling cycle.

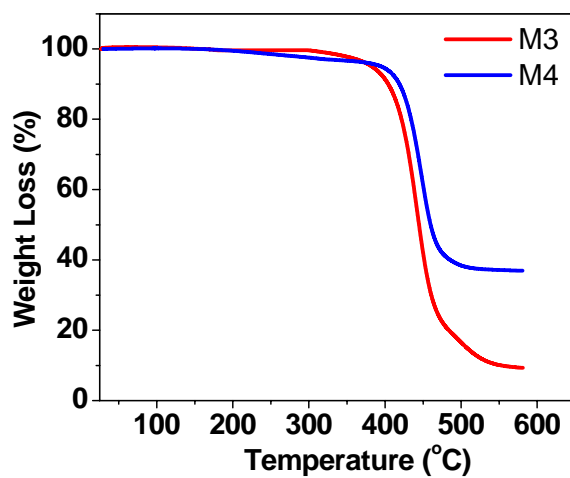

**Fig. S8.** TGA curves of the small molecules with a heating rate of 10°C/min under a nitrogen atmosphere.



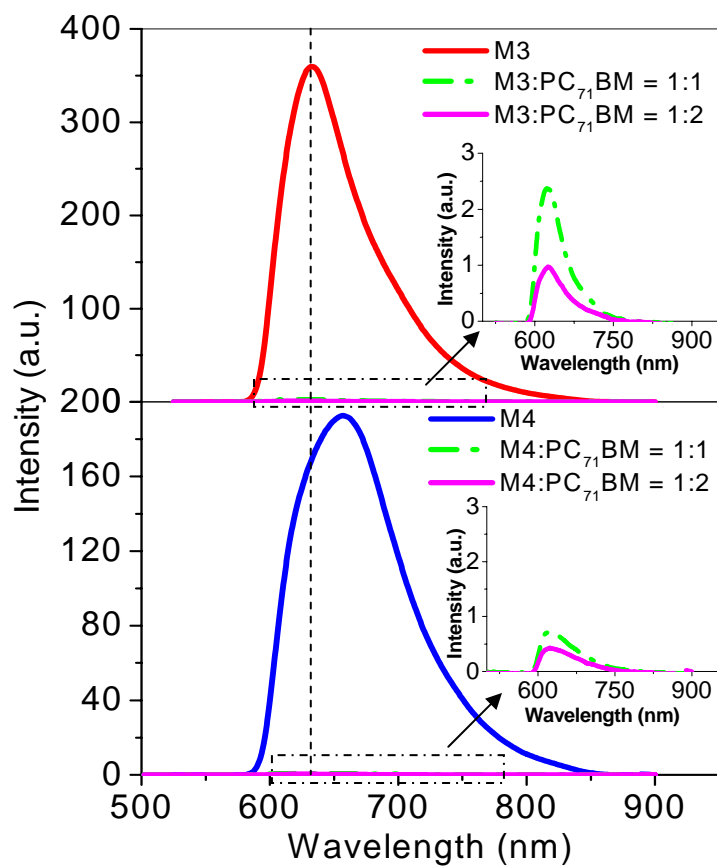

**Fig. S9.** PL spectra of small molecules and small molecules/PC<sub>71</sub>BM-blended thin film.
